# Supplementary material
Source: PubMed Central journal article supplement (PMC3872194)
Supplement: 4f30c5c1ad4bd1267e194f277b78f96d_genetics.113.158758-1.pdf [file 4f30c5c1ad4bd1267e194f277b78f96d_genetics.113.158758-1.pdf]

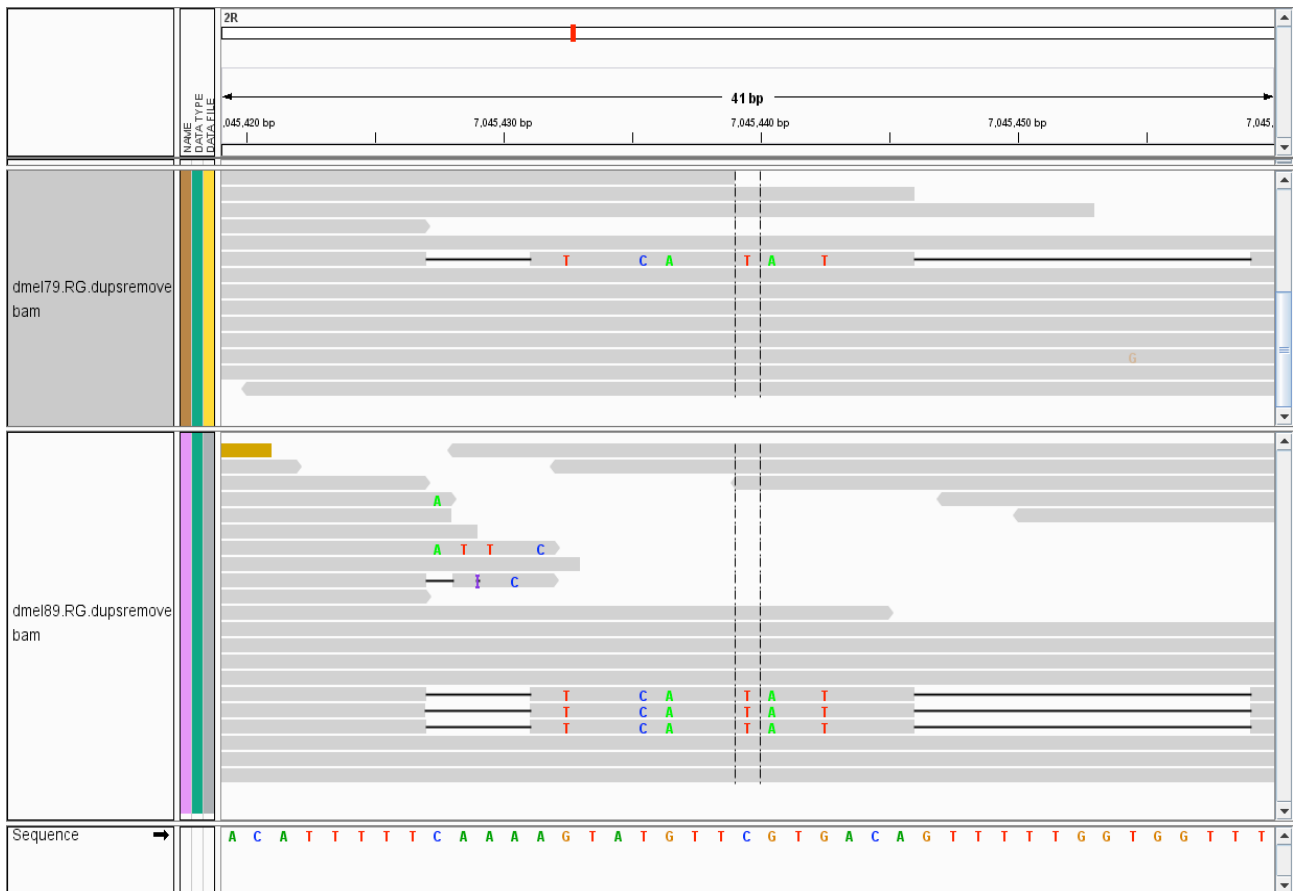

**Figure S1** Screenshot from the IGV showing a typical example of a read mapping error. The reference sequence is shown at the bottom, indicated by “Sequence →”. Reads are indicated as horizontal grey bars, and only bases that differ from the reference are shown. Two individuals separated by a double horizontal line have a candidate C→T mutation at the focal site delimited by the vertical dotted lines. However, each of the reads containing the non-reference base (T) also has five SNPs and two deletions (shown as solid horizontal lines) in perfect association, i.e., none of these variants are present in the reads containing the reference base (C) at the focal site.

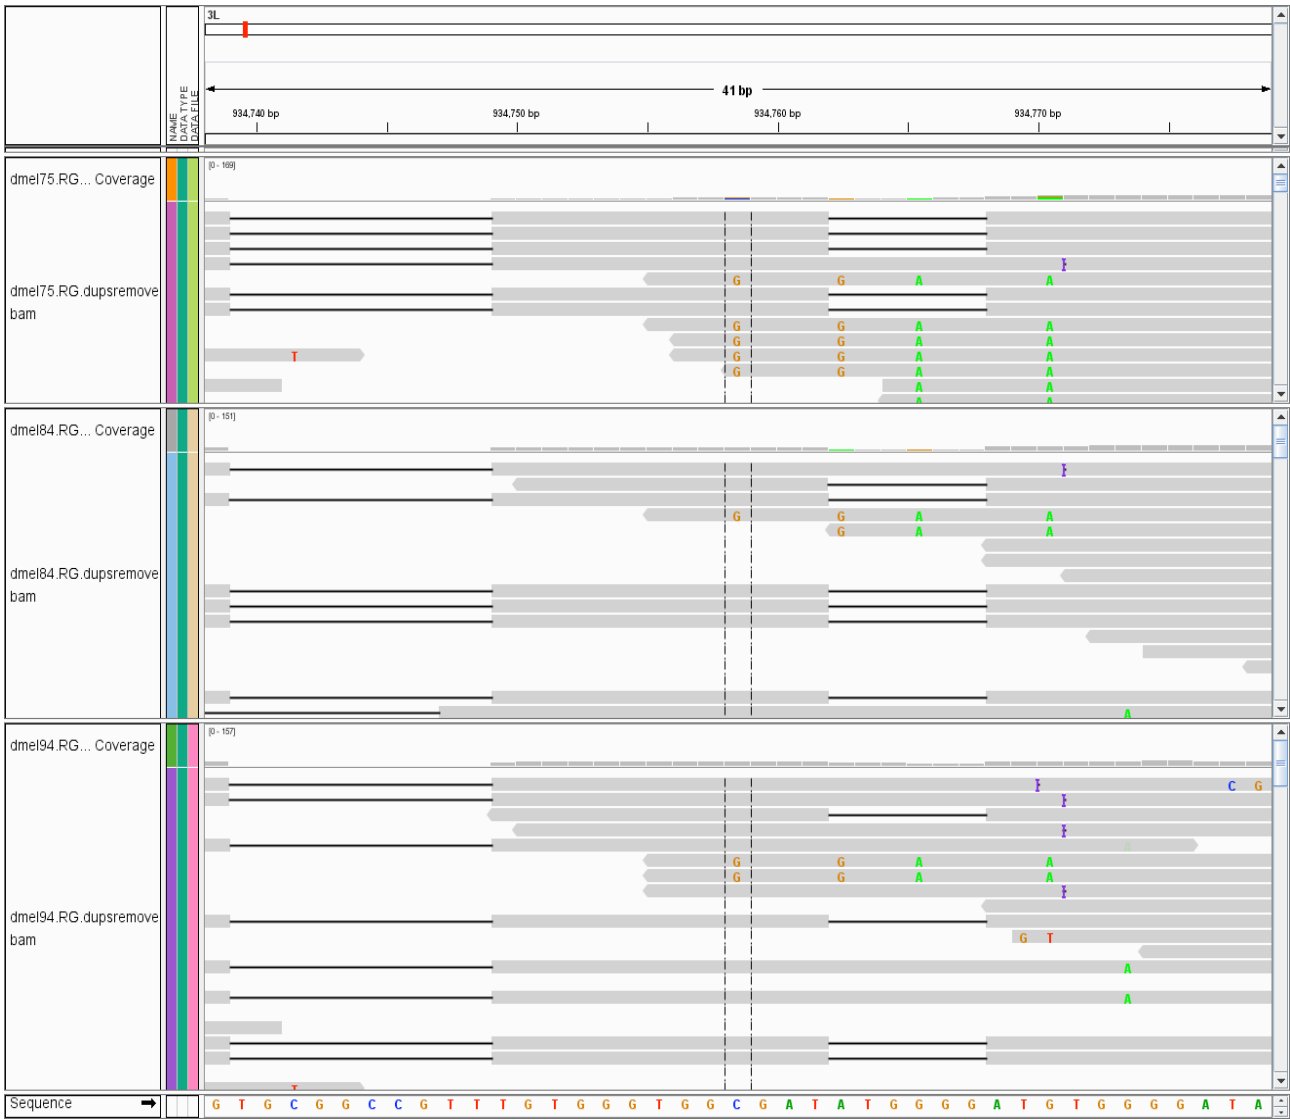

**Figure S2** Screenshot from the IGV showing a second example of a read mapping error caused by mismapping of a paralogous region.

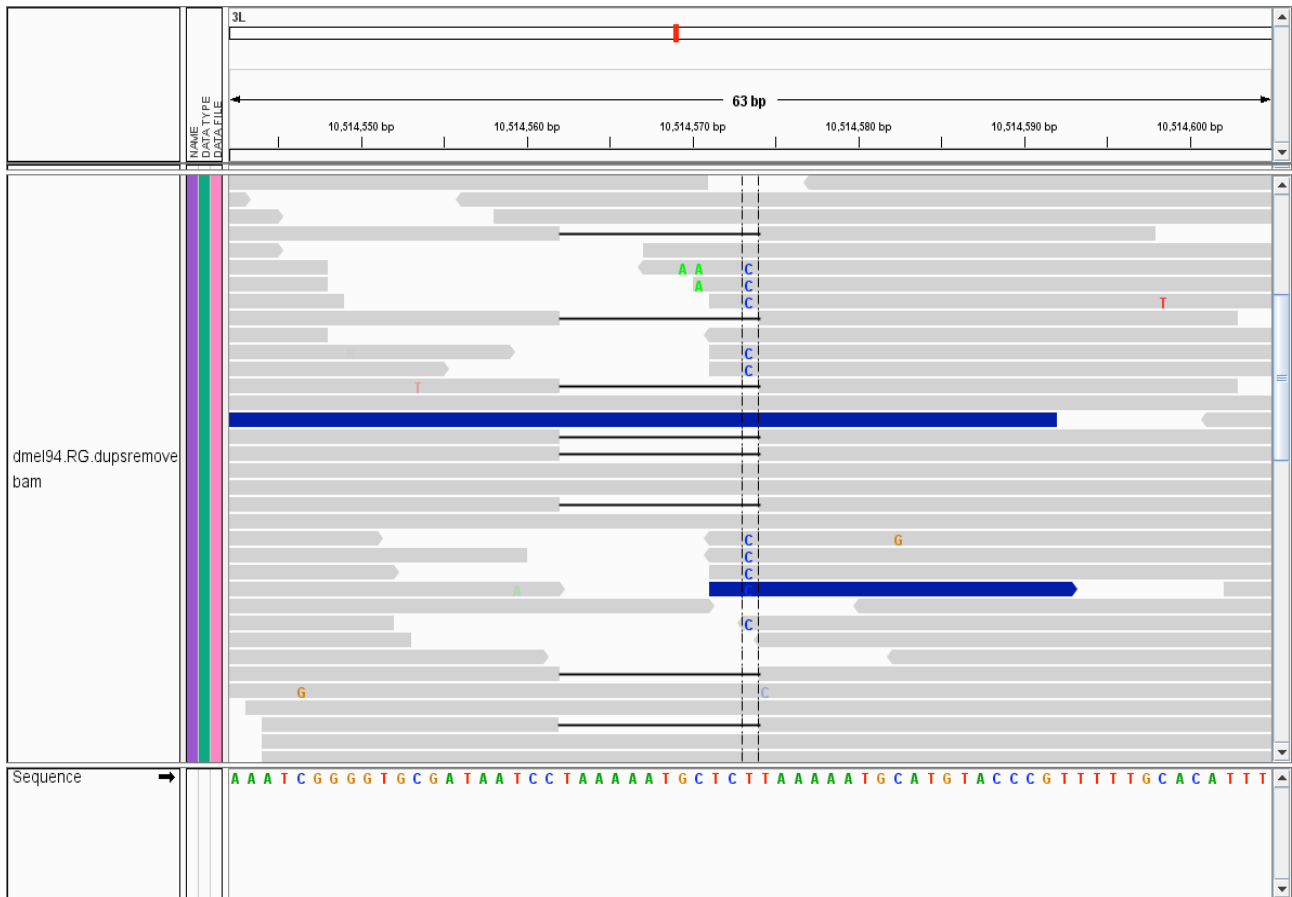

**Figure S3** Screenshot from the IGV. The T→C candidate mutation can be resolving by moving bases leftwards to the opposite end of the deletion (in other words, reads have a deletion, not a SNP).

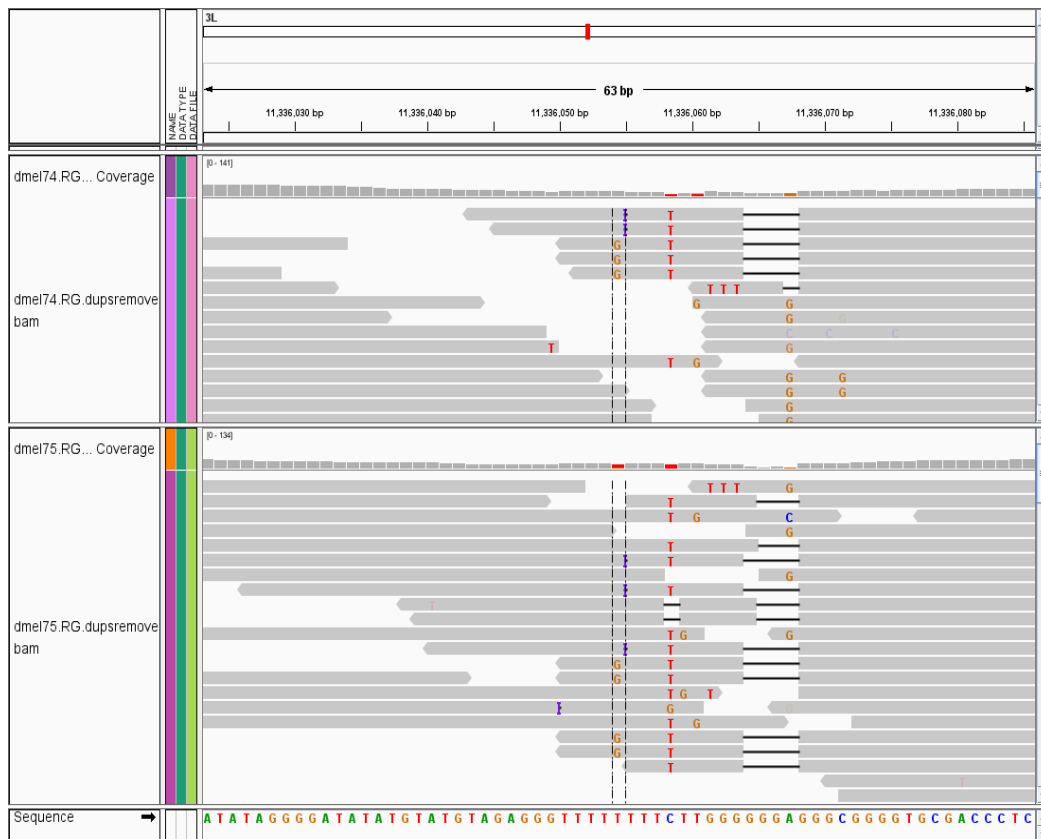

**Figure S4** Screenshot from the IGV showing a candidate mutation associated with a misaligned polymorphic insertion. The T→G candidate mutation can be resolved by supposing that reads carrying the G allele have instead a TTTG insertion (shown as the vertical purple symbol), which is also present in reads of other individuals (including one parent) in addition to the two individuals shown.

**Table S1** Numbers of heterozygous autosomal sites for read depth = 1..100 used to generate tables for the generation of synthetic mutations.

| <b>Depth</b> | <b>Number</b> | <b>Depth</b> | <b>Number</b> |
|--------------|---------------|--------------|---------------|
| 1            | 67            | 51           | 37606         |
| 2            | 90            | 52           | 37274         |
| 3            | 144           | 53           | 37501         |
| 4            | 182           | 54           | 64132         |
| 5            | 221           | 55           | 61228         |
| 6            | 321           | 56           | 31575         |
| 7            | 364           | 57           | 30263         |
| 8            | 487           | 58           | 29175         |
| 9            | 640           | 59           | 28289         |
| 10           | 778           | 60           | 27340         |
| 11           | 932           | 61           | 26041         |
| 12           | 1166          | 62           | 25037         |
| 13           | 1417          | 63           | 24209         |
| 14           | 1693          | 64           | 22691         |
| 15           | 2146          | 65           | 21498         |
| 16           | 2595          | 66           | 20759         |
| 17           | 3215          | 67           | 19868         |
| 18           | 7763          | 68           | 18728         |
| 19           | 9181          | 69           | 17907         |
| 20           | 6743          | 70           | 17107         |
| 21           | 7832          | 71           | 17203         |
| 22           | 9109          | 72           | 26887         |
| 23           | 10470         | 73           | 24931         |
| 24           | 11838         | 74           | 12298         |
| 25           | 13371         | 75           | 11724         |
| 26           | 14501         | 76           | 11197         |
| 27           | 16514         | 77           | 10459         |
| 28           | 18264         | 78           | 9884          |
| 29           | 19674         | 79           | 9350          |
| 30           | 21659         | 80           | 8883          |
| 31           | 23412         | 81           | 8353          |
| 32           | 25267         | 82           | 7700          |
| 33           | 26751         | 83           | 7377          |
| 34           | 28608         | 84           | 6966          |
| 35           | 31354         | 85           | 6520          |
| 36           | 62748         | 86           | 6140          |
| 37           | 62572         | 87           | 5764          |
| 38           | 36518         | 88           | 5310          |
| 39           | 37233         | 89           | 5520          |
| 40           | 38072         | 90           | 8159          |
| 41           | 38707         | 91           | 7616          |
| 42           | 39027         | 92           | 3793          |
| 43           | 39513         | 93           | 3653          |
| 44           | 40063         | 94           | 3329          |
| 45           | 39959         | 95           | 3175          |
| 46           | 39501         | 96           | 3005          |
| 47           | 39850         | 97           | 2804          |
| 48           | 39107         | 98           | 2621          |
| 49           | 38679         | 99           | 2517          |
| 50           | 38274         | 100          | 2360          |
