# Supplementary material
Source: PubMed Central journal article supplement (PMC3872194)
Supplement: 56f311432a644585a4733b510ed50089_genetics.113.158758-2.pdf [file 56f311432a644585a4733b510ed50089_genetics.113.158758-2.pdf]

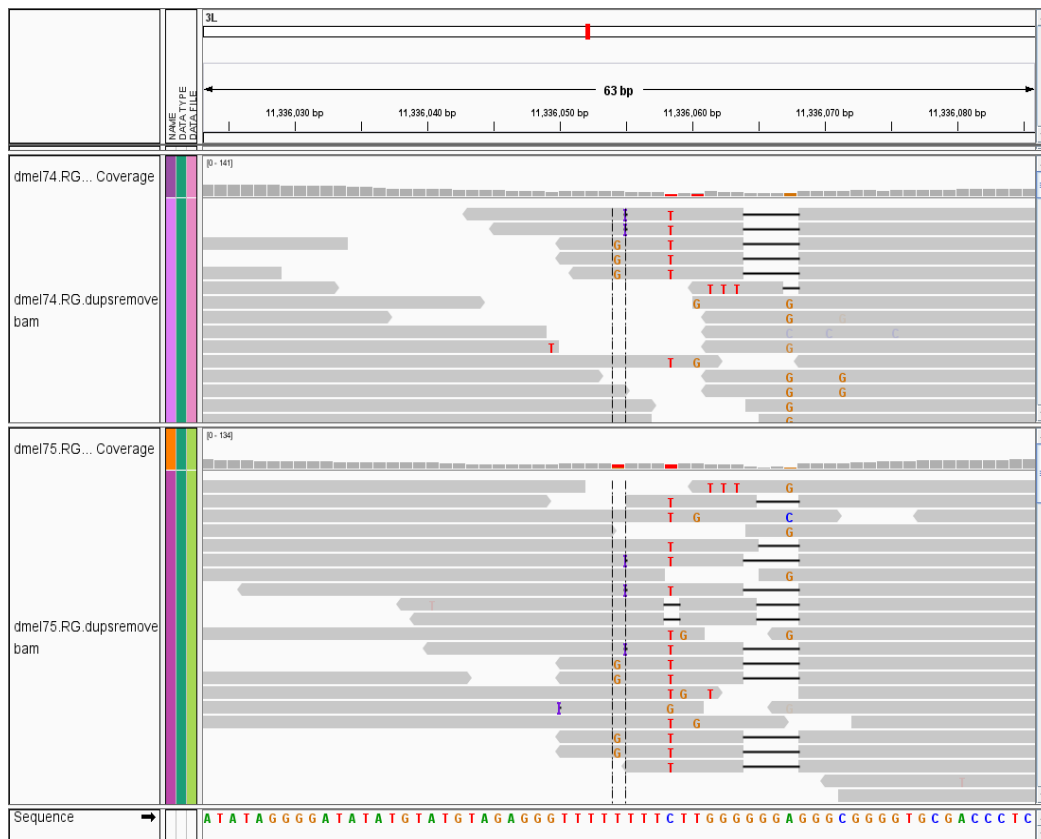

**Figure S4** Screenshot from the IGV showing a candidate mutation associated with a misaligned polymorphic insertion. The T→G candidate mutation can be resolved by supposing that reads carrying the G allele have instead a TTTG insertion (shown as the vertical purple symbol), which is also present in reads of other individuals (including one parent) in addition to the two individuals shown.
