# Supplementary material
Source: PubMed Central journal article supplement (PMC3872194)
Supplement: b955bfc3903e42a1222abe9a63309b61_genetics.113.158758-5.pdf [file b955bfc3903e42a1222abe9a63309b61_genetics.113.158758-5.pdf]

**Table S1** Numbers of heterozygous autosomal sites for read depth = 1..100 used to generate tables for the generation of synthetic mutations.

| <b>Depth</b> | <b>Number</b> | <b>Depth</b> | <b>Number</b> |
|--------------|---------------|--------------|---------------|
| 1            | 67            | 51           | 37606         |
| 2            | 90            | 52           | 37274         |
| 3            | 144           | 53           | 37501         |
| 4            | 182           | 54           | 64132         |
| 5            | 221           | 55           | 61228         |
| 6            | 321           | 56           | 31575         |
| 7            | 364           | 57           | 30263         |
| 8            | 487           | 58           | 29175         |
| 9            | 640           | 59           | 28289         |
| 10           | 778           | 60           | 27340         |
| 11           | 932           | 61           | 26041         |
| 12           | 1166          | 62           | 25037         |
| 13           | 1417          | 63           | 24209         |
| 14           | 1693          | 64           | 22691         |
| 15           | 2146          | 65           | 21498         |
| 16           | 2595          | 66           | 20759         |
| 17           | 3215          | 67           | 19868         |
| 18           | 7763          | 68           | 18728         |
| 19           | 9181          | 69           | 17907         |
| 20           | 6743          | 70           | 17107         |
| 21           | 7832          | 71           | 17203         |
| 22           | 9109          | 72           | 26887         |
| 23           | 10470         | 73           | 24931         |
| 24           | 11838         | 74           | 12298         |
| 25           | 13371         | 75           | 11724         |
| 26           | 14501         | 76           | 11197         |
| 27           | 16514         | 77           | 10459         |
| 28           | 18264         | 78           | 9884          |
| 29           | 19674         | 79           | 9350          |
| 30           | 21659         | 80           | 8883          |
| 31           | 23412         | 81           | 8353          |
| 32           | 25267         | 82           | 7700          |
| 33           | 26751         | 83           | 7377          |
| 34           | 28608         | 84           | 6966          |
| 35           | 31354         | 85           | 6520          |
| 36           | 62748         | 86           | 6140          |
| 37           | 62572         | 87           | 5764          |
| 38           | 36518         | 88           | 5310          |
| 39           | 37233         | 89           | 5520          |
| 40           | 38072         | 90           | 8159          |
| 41           | 38707         | 91           | 7616          |
| 42           | 39027         | 92           | 3793          |
| 43           | 39513         | 93           | 3653          |
| 44           | 40063         | 94           | 3329          |
| 45           | 39959         | 95           | 3175          |
| 46           | 39501         | 96           | 3005          |
| 47           | 39850         | 97           | 2804          |
| 48           | 39107         | 98           | 2621          |
| 49           | 38679         | 99           | 2517          |
| 50           | 38274         | 100          | 2360          |
