# Supplementary material
Source: PubMed Central journal article supplement (PMC3872194)
Supplement: f0c47bc3bc28b0af698eec4d50f82f80_genetics.113.158758-3.pdf [file f0c47bc3bc28b0af698eec4d50f82f80_genetics.113.158758-3.pdf]

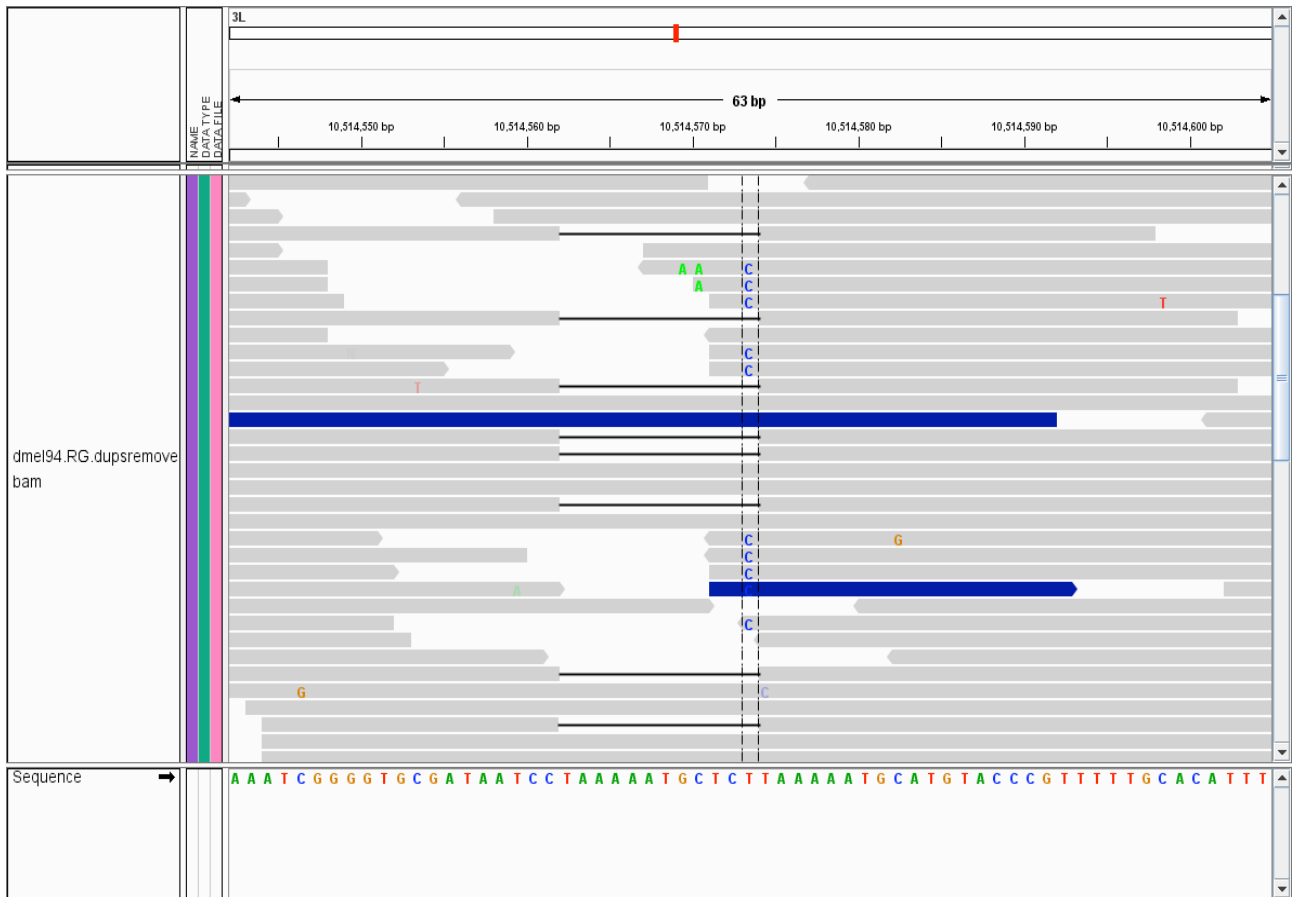

**Figure S3** Screenshot from the IGV. The T→C candidate mutation can be resolving by moving bases leftwards to the opposite end of the deletion (in other words, reads have a deletion, not a SNP).
