# Supplementary material
Source: PubMed Central journal article supplement (PMC3872194)
Supplement: f8f0450405fa436efc9639ff8e408397_genetics.113.158758-4.pdf [file f8f0450405fa436efc9639ff8e408397_genetics.113.158758-4.pdf]

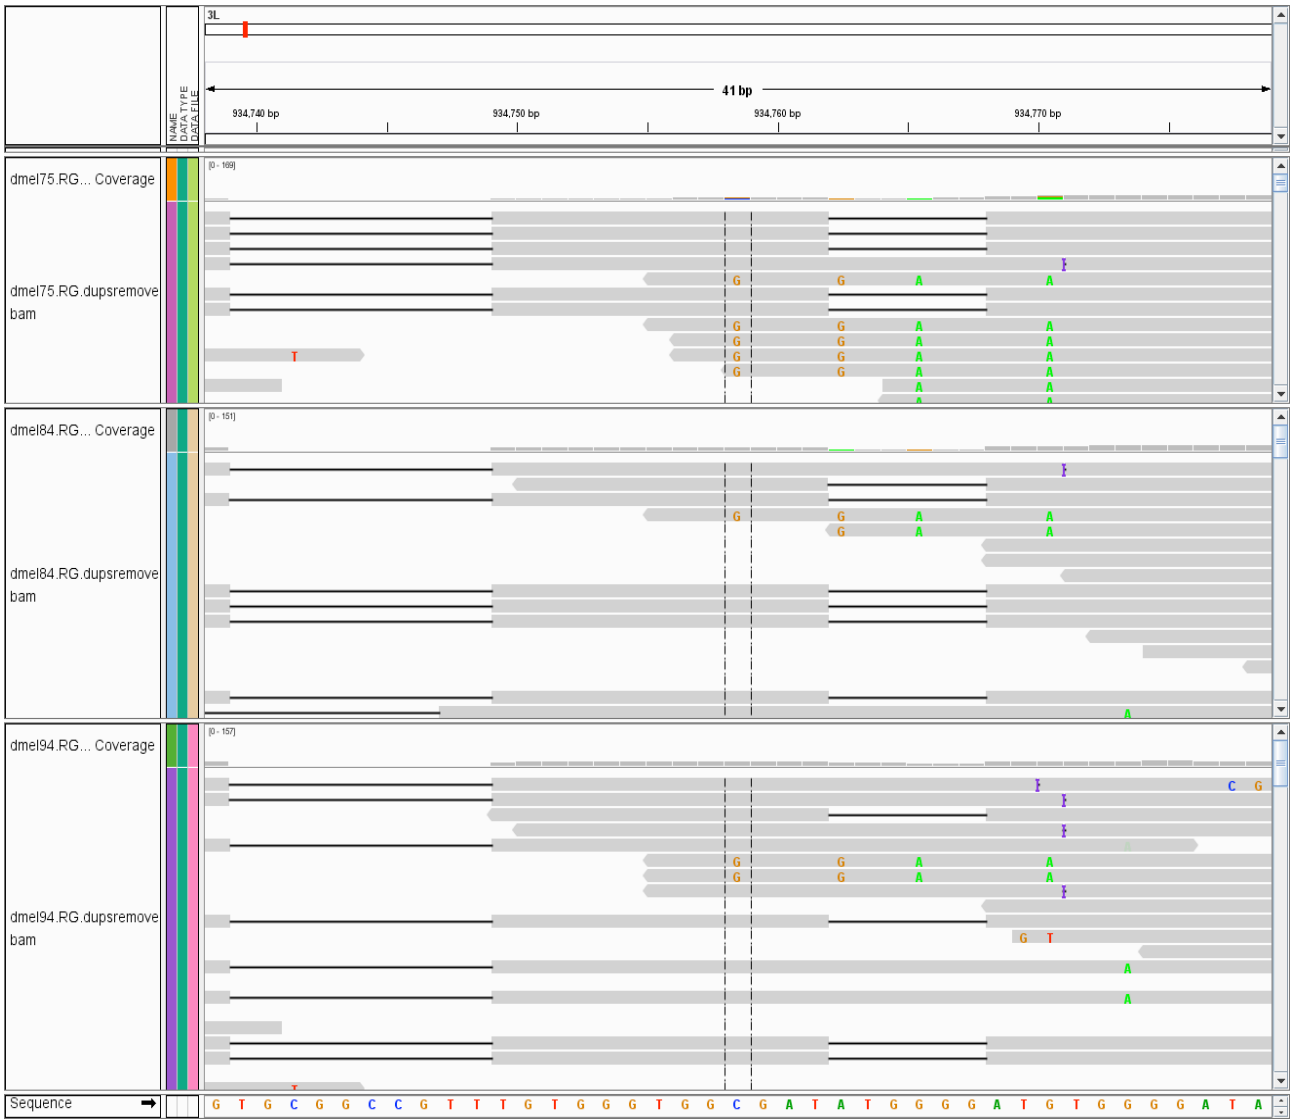

**Figure S2** Screenshot from the IGV showing a second example of a read mapping error caused by mismapping of a paralogous region.
